# Supplementary material for: Stereoelectronic effects in the reaction of aromatic substrates catalysed by Halomonas elongata transaminase and its mutants
Source: Royal Society of Chemistry journal article supplement (doi:10.1039/c6ob01629d), 2016-01-01
Supplement: c6ob01629d1.pdf [file c6ob01629d1.pdf]

*SUPPORTING INFORMATION*

**Stereoelectronic effects in the reaction of aromatic substrates catalysed by  
*Halomonas elongata* transaminase and its mutants**

Martina Letizia Contente<sup>a,b</sup>, Matteo Planchestainer<sup>a</sup>, Francesco Molinari<sup>b\*</sup>, Francesca Paradisi<sup>a,c\*</sup>

<sup>a</sup> *UCD School of Chemistry, University College Dublin, Belfield, Dublin 4, Ireland*

<sup>b</sup> *Department of Food, Environmental and Nutritional Sciences (DeFENS), Università degli studi di Milano, Via Mangiagalli 25, 20133, Milan, Italy*

<sup>c</sup> *School of Chemistry, University of Nottingham, University Park, Nottingham, NG7 2RD, UK*

**Corresponding authors**

Francesca Paradisi

E-mail: francesca.paradisi@nottingham.ac.uk

Telephone: +44(0)115 74 86267

Fax: +44(0)1159513564

Address: School of Chemistry, University of Nottingham, University Park, Nottingham, NG7 2RD, UK

Francesco Molinari

E-mail: francesco.molinari@unimi.it

Telephone: +39(0)250319148

Fax: +39(0)250319191

Address: Department of Food, Environmental and Nutritional Sciences (DeFENS), University of Milan, Italy

## Table of contents:

- 1 – Table S.1 (retention times of ketones, aldehydes, and amines)
- 2 - Transaminases' stability
- 3 - Docking energy results

**Table S.1:** retention times of ketones, aldehydes, and amines in isocratic run with 25% acetonitrile/75% water with TFA 0.1% v/v at 25 °C with a flow rate of 1 mL/min (Supelcosil LC-18-T column (250 mm x 4.6 mm, 5 µm particle size; Supelco, Sigma-Aldrich, Germany)

| Ketones/Aldehydes               | Retention time | Amines                                 | Retention time |
|---------------------------------|----------------|----------------------------------------|----------------|
| Acetophenone                    | 12.2 min       | (S)-Phenylethylamine                   | 4.3 min        |
| <i>p</i> -Nitroacetophenone     | 16.2 min       | (S)- <i>p</i> -Nitrophenylethanamine   | 4.8 min        |
| <i>m</i> -Nitroacetophenone     | 15.1 min       | (S)- <i>m</i> -Nitrophenylethanamine   | 4.7 min        |
| <i>o</i> -Nitroacetophenone     | 12.9 min       | (S)- <i>o</i> -Nitrophenylethanamine   | 4.4 min        |
| <i>p</i> -Fluoroacetophenone    | 14.3 min       | (S)- <i>p</i> -Fluorophenylethanamine  | 4.6 min        |
| <i>m</i> -Fluoroacetophenone    | 14.5 min       | (S)- <i>m</i> -Fluorophenylethanamine  | 4.6 min        |
| <i>o</i> -Fluoroacetophenone    | 14.7 min       | (S)- <i>o</i> -Fluorophenylethanamine  | 4.2 min        |
| <i>p</i> -Trifluoroacetophenone | 39.4 min       | n.a.                                   | -              |
| <i>m</i> -Trifluoroacetophenone | 46.6 min       | n.a.                                   | -              |
| <i>o</i> -Trifluoroacetophenone | 35.9 min       | n.a.                                   | -              |
| <i>p</i> -Methoxyacetophenone   | 14.8 min       | (S)- <i>p</i> -Methoxyphenylethanamine | 4.6 min        |
| <i>m</i> -Methoxyacetophenone   | 14.4 min       | (S)- <i>m</i> -Methoxyphenylethanamine | 4.7 min        |
| <i>o</i> -Methoxyacetophenone   | 15.9 min       | (S)- <i>o</i> -Methoxyphenylethanamine | 5.1 min        |
| <i>p</i> -Methylacetophenone    | 22.2 min       | (S)- <i>p</i> -Methylphenylethanamine  | 5.9 min        |
| <i>m</i> -Methylacetophenone    | 22.1 min       | n.a.                                   | -              |
| <i>o</i> -Methylacetophenone    | 22.7 min       | n.a.                                   | -              |
| Benzaldehyde                    | 10.6 min       | phenylmethanamine                      | 3.7 min        |
| <i>p</i> -Nitrobenzaldehyde     | 12.2 min       | <i>p</i> -Nitrophenylmethanamine       | 4.2 min        |
| <i>m</i> -Nitrobenzaldehyde     | 12.0 min       | <i>m</i> -Nitrophenylmethanamine       | 4.1 min        |
| <i>o</i> -Nitrobenzaldehyde     | 12.3 min       | <i>o</i> -Nitrophenylmethanamine       | 3.7 min        |
| <i>p</i> -Fluorobenzaldehyde    | 12.3 min       | <i>p</i> -Fluorophenylmethanamine      | 4.1 min        |
| <i>m</i> -Fluorobenzaldehyde    | 13.5 min       | <i>m</i> -Fluorophenylmethanamine      | 4.0 min        |
| <i>o</i> -Fluorobenzaldehyde    | 12.2 min       | <i>o</i> -Fluorophenylmethanamine      | 3.7 min        |
| <i>p</i> -Trifluorobenzaldehyde | 41.2 min       | <i>p</i> -Trifluorophenylmethanamine   | 7.2 min        |
| <i>m</i> -Trifluorobenzaldehyde | 38.8 min       | <i>m</i> -Trifluorophenylmethanamine   | 7.1 min        |
| <i>o</i> -Trifluorobenzaldehyde | 39.8 min       | <i>o</i> -Trifluorophenylmethanamine   | 5.4 min        |
| <i>p</i> -Methoxybenzaldehyde   | 16.2 min       | <i>p</i> -Methoxyphenylmethanamine     | 4.3 min        |
| <i>m</i> -Methoxybenzaldehyde   | 16.8 min       | <i>m</i> -Methoxyphenylmethanamine     | 4.2 min        |
| <i>o</i> -Methoxybenzaldehyde   | 15.6 min       | <i>o</i> -Methoxyphenylmethanamine     | 4.2 min        |
| <i>p</i> -Methylbenzaldehyde    | 18.7 min       | <i>p</i> -Methylphenylmethanamine      | 4.8 min        |
| <i>m</i> -Methylbenzaldehyde    | 20.4 min       | <i>m</i> -Methylphenylmethanamine      | 4.7 min        |
| <i>o</i> -Methylbenzaldehyde    | 19.4 min       | <i>o</i> -Methylphenylmethanamine      | 4.4 min        |

## 2 – Transaminases' stability

Stability of transaminases in the reaction conditions tested was determined by spectrophotometric enzyme assay performed with phosphate buffer 50 mM pH 8 in the presence of pyridoxal 5'-phosphate (PLP) 0.1 mM, (S)-PEA 25 mM and Pyruvate 25 mM. The analysis of the residual activity was carried out at 25 °C and 100% corresponds to the activity before incubation ( $3.99 \pm 0.02$  U/mg for wild type enzyme,  $4.43 \pm 0.02$  U/mg for W56G,  $0.50 \pm 0.01$  for Y149F,  $0.06 \pm 0.01$  U/mg for F84A and  $0.43 \pm 0.02$  for I258A). Each reaction was performed in triplicates and the results reported as the average of the data obtained.

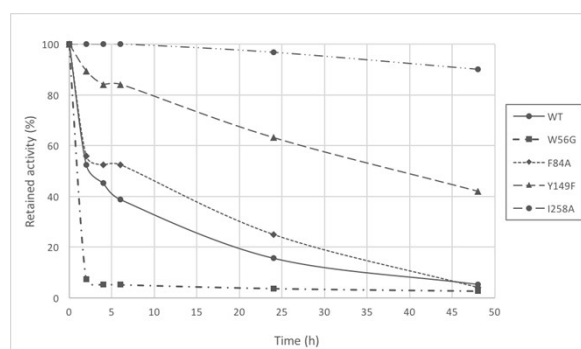

**Figure S.1:** temperature stability profile of HEWT WT and mutants

### 3 – In silico mutations evaluation

Table S.2 shows the docking energies (expressed in Kcal/mol) for the WT enzyme and different mutants at each position calculated against four different molecules. The natural substrate (S)-PEA was used as reference compound to tune the methodology; subsequently the *ortho*-, *meta*-, and *para*-nitro substituted acetophenones were tested to identify the more plausible mutations able enhance binding of such substrates.

**Table S.2:** Substrates' docking energies (Kcal/mol) determined by the simulation software Autodock Vina.

| Position | Mutation | (S)-PEA     | <i>o</i> -NO <sub>2</sub> | <i>m</i> -NO <sub>2</sub> | <i>p</i> -NO <sub>2</sub> |
|----------|----------|-------------|---------------------------|---------------------------|---------------------------|
| W56      | -        | -7.5        | -4.2                      | -5.4                      | -3.1                      |
|          | <b>G</b> | <b>-7.6</b> | <b>-8.3</b>               | <b>-7.3</b>               | <b>-7.6</b>               |
|          | A        | -7.5        | -6.7                      | -6.4                      | -6.7                      |
|          | L        | -7.2        | -6.3                      | -6.3                      | -6.2                      |
|          | F        | -7.6        | -5.5                      | -5.7                      | -5.2                      |
| F84      | -        | -7.5        | -4.2                      | -5.4                      | -3.1                      |
|          | G        | -           | -7.6                      | -6.9                      | -4.1                      |
|          | <b>A</b> | <b>-3.0</b> | <b>-8.0</b>               | <b>-7.5</b>               | <b>-4.3</b>               |
|          | L        | -6.7        | -6.1                      | -6.4                      | -4.0                      |
|          | W        | -6.7        | -5.0                      | -6.0                      | -2.5                      |
| Y149     | -        | -7.5        | -4.2                      | -5.4                      | -3.1                      |
|          | G        | -7.4        | -5.7                      | -6.3                      | -4.4                      |
|          | A        | -7.1        | -5.8                      | -6.2                      | -4.1                      |
|          | <b>F</b> | <b>-7.2</b> | <b>-5.1</b>               | <b>-5.6</b>               | <b>-3.4</b>               |
| I258     | -        | -7.5        | -4.2                      | -5.4                      | -3.1                      |
|          | G        | -6.2        | -6.5                      | -7.0                      | -7.3                      |
|          | <b>A</b> | <b>-6.8</b> | <b>-6.6</b>               | <b>-7.3</b>               | <b>-7.4</b>               |
|          | V        | -7.2        | -6.2                      | -5.1                      | -4.2                      |
